# Supplementary material for: 123 Development of Mouse Early Embryos in CZB Medium.
Source: Royal Society of Chemistry journal article supplement (doi:10.1039/c2nr33521b), 1991-01-01
Supplement: c2nr33521b.pdf [file c2nr33521b.pdf]

## Supporting Information

### Advanced visible-light-driven photocatalyst upon the incorporation of sulfonated graphene

Bin Cai,<sup>a,b</sup> Xiangyu Lv,<sup>a</sup> Shiyu Gan,<sup>a,b</sup> Min Zhou,<sup>a,b</sup> Weiguang Ma,<sup>a,b</sup> Tongshun Wu,<sup>a</sup> Fenghua Li,<sup>a</sup> Dongxue Han<sup>\*a</sup> and Li Niu<sup>a,c</sup>

<sup>a</sup> State Key Laboratory of Electroanalytical Chemistry, c/o Engineering Laboratory for Modern Analytical Techniques, Changchun Institute of Applied Chemistry, Chinese Academy of Sciences, Changchun 130022, Jilin, China. E-mail: dxhan@ciac.jl.cn

<sup>b</sup> Graduate University of the Chinese Academy of Sciences, Beijing 100039, China.

<sup>c</sup> Changzhou Institute of Energy Storage Materials and Devices, Changzhou 213001, China.

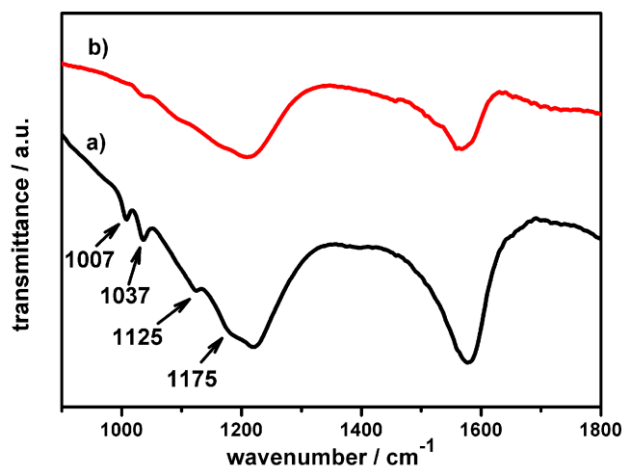

**Fig. S1** FTIR spectra of sulfonated graphene (a) and chemically reduced graphene oxide (b).

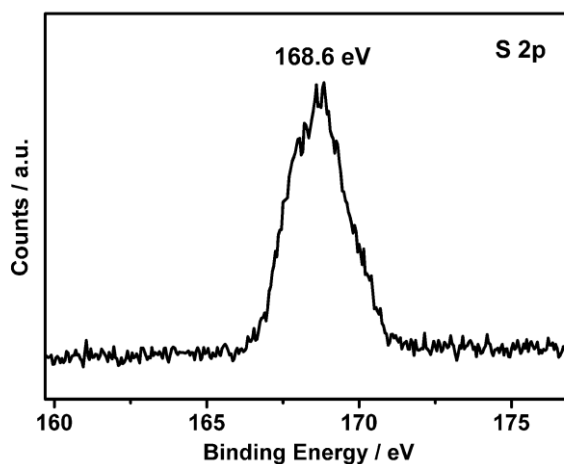

**Fig. S2** The S2p spectrum of sulfonated graphene.

As shown in Fig. S1, FTIR spectra were performed to confirm the presence of  $\text{--SO}_3\text{H}$  units. By comparison with chemically reduced graphene oxide, SGE display peaks at  $1175\text{ cm}^{-1}$  ( $\nu_{\text{S-O}}$ ),  $1125\text{ cm}^{-1}$  ( $\nu_{\text{S-O}}$ ) and  $1037\text{ cm}^{-1}$  ( $\nu_{\text{S-phenyl}}$ ) which confirm the presence of sulfonic acid group. Furthermore, the peak at  $1007\text{ cm}^{-1}$  ( $\nu_{\text{C-H}}$  in-plane bending) is the characteristic vibrations of the p-disubstituted phenyl group<sup>1</sup>. As shown in Fig. S2, it is necessary to note that the peak at 168.6 eV corresponds to S2p XPS spectrum, suggesting the existence of benzenesulfonic groups in sulfonated graphene nanosheets<sup>2</sup>.

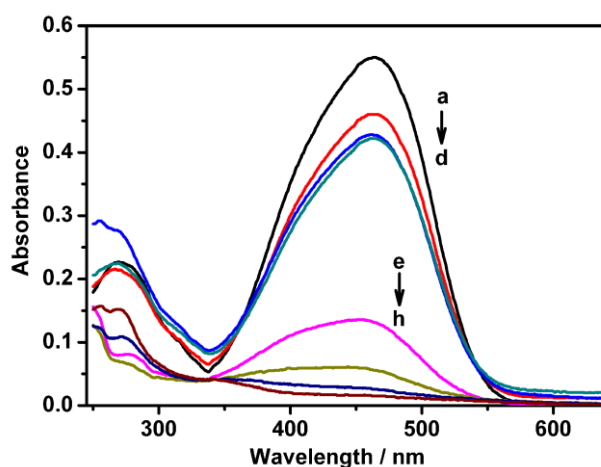

**Fig. S3** Typical real-time absorption spectra of MO dye during the photodegradation process over Ag@AgBr/SGE (SGE contents 1.33 wt %) under visible irradiation ( $\lambda > 420\text{ nm}$ ). The curves marked as (a) to (d) are the absorption spectra of MO in the dark with absorption time varying in 0, 10, 20 and 30 min while (e) to (h) stand for irradiation time in 0.5, 1, 1.5, 2 min.

## References

- 1 Y. Si and E. T. Samulski, *Nano Lett.*, 2008, **8**, 1679.
- 2 G. Zhao, L. Jiang, Y. He, J. Li, H. Dong, X. Wang and W. Hu, *Adv. Mater.*, 2011, **23**, 3959.
